# Supplementary material
Source: MDPI journal article supplement (https://www.mdpi.com/2073-8994/13/8/1349)
Supplement: s1 [file s1]

**Table S1.** Percentage of figures perceived as right-limbed by female and male participants according to outstretched limb and type of rotation.

| OUTSTRETCHED LIMB | TYPE OF ROTATION | SEX | N  | PERCENTAGE | t      | df | p     |
|-------------------|------------------|-----|----|------------|--------|----|-------|
| ARM               | INWARD           | F   | 21 | 49,24      | -0,232 | 39 | 1     |
|                   |                  | M   | 20 | 50,61      |        |    |       |
|                   | OUTWARD          | F   | 21 | 46,79      | -1,947 | 39 | 0,235 |
|                   |                  | M   | 20 | 57,34      |        |    |       |
| LEG               | INWARD           | F   | 28 | 42,86      | -3,060 | 46 | 0,015 |
|                   |                  | M   | 20 | 57,99      |        |    |       |
|                   | OUTWARD          | F   | 28 | 58,47      | 1,713  | 46 | 0,374 |
|                   |                  | M   | 20 | 50,08      |        |    |       |

**Table S2.** Percentage of figures perceived as right-limbed in the arm- and leg-outstretched versions of the experiment according to participant's sex and type of rotation.

| SEX | TYPE OF ROTATION | OUTSTRETCHED LIMB | N  | PERCENTAGE | t      | df | p     |
|-----|------------------|-------------------|----|------------|--------|----|-------|
| F   | INWARD           | ARM               | 21 | 49,24      | 1,220  | 47 | 0,915 |
|     |                  | LEG               | 28 | 42,86      |        |    |       |
|     | OUTWARD          | ARM               | 21 | 46,79      | -2,497 | 47 | 0,064 |
|     |                  | LEG               | 28 | 58,47      |        |    |       |
| M   | INWARD           | ARM               | 20 | 50,61      | -1,332 | 38 | 0,763 |
|     |                  | LEG               | 20 | 57,99      |        |    |       |
|     | OUTWARD          | ARM               | 20 | 57,34      | 1,278  | 38 | 0,837 |
|     |                  | LEG               | 20 | 50,08      |        |    |       |

**Table S3.** Percentage of figures perceived as right-limbed in the inward- and outward-rotation conditions according to participant's sex and type of rotation.

| SEX | OUTSTRETCHED LIMB | TYPE OF ROTATION | N  | PERCENTAGE | t      | df | p     |
|-----|-------------------|------------------|----|------------|--------|----|-------|
| F   | ARM               | INWARD           | 21 | 49,24      | 0,431  | 20 | 1     |
|     |                   | OUTWARD          | 21 | 46,79      |        |    |       |
|     | LEG               | INWARD           | 28 | 42,86      | -2,616 | 27 | 0,058 |
|     |                   | OUTWARD          | 28 | 58,47      |        |    |       |
| M   | ARM               | INWARD           | 20 | 50,61      | -0,874 | 19 | 1     |
|     |                   | OUTWARD          | 20 | 57,34      |        |    |       |
|     | LEG               | INWARD           | 20 | 57,99      | 1,104  | 19 | 1     |
|     |                   | OUTWARD          | 20 | 50,08      |        |    |       |

**Table S4.** Percentage of figures perceived as right- and left-limbed according to participant's sex, outstretched limb, hemifield of presentation and type of rotation.

| SEX | OUTSTRETCHED LIMB | HEMIFIELD | TYPE OF ROTATION | LIMBEDNESS | N  | PERCENTAGE | t      | df | p     |
|-----|-------------------|-----------|------------------|------------|----|------------|--------|----|-------|
| F   | ARM               | RIGHT     | INWARD           | RIGHT      | 21 | 59,88      | 1,763  | 20 | 1     |
|     |                   |           |                  | LEFT       | 21 | 40,12      |        |    |       |
|     |                   |           | OUTWARD          | RIGHT      | 21 | 39,93      | -2,524 | 20 | 0,323 |
|     |                   |           |                  | LEFT       | 21 | 60,07      |        |    |       |
|     |                   | LEFT      | INWARD           | RIGHT      | 21 | 38,61      | -1,887 | 20 | 1     |
|     |                   |           |                  | LEFT       | 21 | 61,39      |        |    |       |
|     |                   |           | OUTWARD          | RIGHT      | 21 | 53,65      | 0,673  | 20 | 1     |
|     |                   |           |                  | LEFT       | 21 | 46,35      |        |    |       |
|     | LEG               | RIGHT     | INWARD           | RIGHT      | 28 | 44,71      | -0,990 | 27 | 1     |
|     |                   |           |                  | LEFT       | 28 | 55,29      |        |    |       |
|     |                   |           | OUTWARD          | RIGHT      | 28 | 57,22      | 1,538  | 27 | 1     |
|     |                   |           |                  | LEFT       | 28 | 42,78      |        |    |       |
|     |                   | LEFT      | INWARD           | RIGHT      | 28 | 41,01      | -1,923 | 27 | 1     |
|     |                   |           |                  | LEFT       | 28 | 58,99      |        |    |       |
|     |                   |           | OUTWARD          | RIGHT      | 28 | 59,71      | 2,126  | 27 | 0,685 |
|     |                   |           |                  | LEFT       | 28 | 40,29      |        |    |       |
| M   | ARM               | RIGHT     | INWARD           | RIGHT      | 20 | 54,69      | 1,340  | 19 | 1     |
|     |                   |           |                  | LEFT       | 20 | 45,31      |        |    |       |
|     |                   |           | OUTWARD          | RIGHT      | 20 | 55,77      | 1,306  | 19 | 1     |
|     |                   |           |                  | LEFT       | 20 | 44,23      |        |    |       |
|     |                   | LEFT      | INWARD           | RIGHT      | 20 | 46,53      | -0,579 | 19 | 1     |
|     |                   |           |                  | LEFT       | 20 | 53,47      |        |    |       |
|     |                   |           | OUTWARD          | RIGHT      | 20 | 58,91      | 1,436  | 19 | 1     |
|     |                   |           |                  | LEFT       | 20 | 41,09      |        |    |       |
|     | LEG               | RIGHT     | INWARD           | RIGHT      | 20 | 69,06      | 3,524  | 19 | 0,036 |
|     |                   |           |                  | LEFT       | 20 | 30,94      |        |    |       |
|     |                   |           | OUTWARD          | RIGHT      | 20 | 40,53      | -1,837 | 19 | 1     |
|     |                   |           |                  | LEFT       | 20 | 59,47      |        |    |       |
|     |                   | LEFT      | INWARD           | RIGHT      | 20 | 46,92      | -0,617 | 19 | 1     |
|     |                   |           |                  | LEFT       | 20 | 53,08      |        |    |       |
|     |                   |           | OUTWARD          | RIGHT      | 20 | 59,62      | 2,121  | 19 | 0,757 |
|     |                   |           |                  | LEFT       | 20 | 40,38      |        |    |       |

**Table S5.** Percentage of figures perceived as right-limbed in each hemifield according to participant's sex, outstretched limb and type of rotation.

| SEX | OUTSTRETCHED LIMB | TYPE OF ROTATION | HEMIFIELD | N  | PERCENTAGE | t      | df | p     |
|-----|-------------------|------------------|-----------|----|------------|--------|----|-------|
| F   | ARM               | INWARD           | RIGHT     | 21 | 59,88      | 2,831  | 20 | 0,083 |
|     |                   |                  | LEFT      | 21 | 38,61      |        |    |       |
|     |                   | OUTWARD          | RIGHT     | 21 | 39,93      | -2,105 | 20 | 0,385 |
|     |                   |                  | LEFT      | 21 | 53,65      |        |    |       |
|     | LEG               | INWARD           | RIGHT     | 28 | 44,71      | 0,466  | 27 | 1     |
|     |                   |                  | LEFT      | 28 | 41,01      |        |    |       |
|     |                   | OUTWARD          | RIGHT     | 28 | 57,22      | -0,362 | 27 | 1     |
|     |                   |                  | LEFT      | 28 | 59,71      |        |    |       |
| M   | ARM               | INWARD           | RIGHT     | 20 | 54,69      | 1,345  | 19 | 1     |
|     |                   |                  | LEFT      | 20 | 46,53      |        |    |       |
|     |                   | OUTWARD          | RIGHT     | 20 | 55,77      | -0,466 | 19 | 1     |
|     |                   |                  | LEFT      | 20 | 58,91      |        |    |       |
|     | LEG               | INWARD           | RIGHT     | 20 | 69,06      | 3,299  | 19 | 0,030 |
|     |                   |                  | LEFT      | 20 | 46,92      |        |    |       |
|     |                   | OUTWARD          | RIGHT     | 20 | 40,53      | -3,206 | 19 | 0,037 |
|     |                   |                  | LEFT      | 20 | 59,62      |        |    |       |

**Table S6.** Percentage of figures perceived as right-limbed by female and male participants according to outstretched limb, hemifield of presentation and type of rotation.

| OUTSTRETCHED LIMB | HEMIFIELD | TYPE OF ROTATION | SEX | N  | PERCENTAGE | t      | df | p     |
|-------------------|-----------|------------------|-----|----|------------|--------|----|-------|
| ARM               | RIGHT     | INWARD           | F   | 21 | 59,88      | 0,775  | 39 | 1     |
|                   |           |                  | M   | 20 | 54,69      |        |    |       |
|                   |           | OUTWARD          | F   | 21 | 39,93      | -2,666 | 39 | 0,089 |
|                   |           |                  | M   | 20 | 55,77      |        |    |       |
|                   | LEFT      | INWARD           | F   | 21 | 38,61      | -0,931 | 39 | 1     |
|                   |           |                  | M   | 20 | 46,53      |        |    |       |
|                   |           | OUTWARD          | F   | 21 | 53,65      | -0,641 | 39 | 1     |
|                   |           |                  | M   | 20 | 58,91      |        |    |       |
| LEG               | RIGHT     | INWARD           | F   | 28 | 44,71      | -3,121 | 46 | 0,025 |
|                   |           |                  | M   | 20 | 69,06      |        |    |       |
|                   |           | OUTWARD          | F   | 28 | 57,22      | 2,363  | 46 | 0,179 |
|                   |           |                  | M   | 20 | 40,53      |        |    |       |
|                   | LEFT      | INWARD           | F   | 28 | 41,01      | -0,849 | 46 | 1     |
|                   |           |                  | M   | 20 | 46,92      |        |    |       |
|                   |           | OUTWARD          | F   | 28 | 59,71      | 0,014  | 46 | 1     |
|                   |           |                  | M   | 20 | 59,62      |        |    |       |

**Table S7.** Percentage of figures perceived as spinning clockwise (CW) and counterclockwise (CCV) according to participant's sex and outstretched limb.

| SEX | OUTSTRETCHED LIMB | SPINNING DIRECTION | N  | PERCENTAGE | t      | df | p     |
|-----|-------------------|--------------------|----|------------|--------|----|-------|
| F   | ARM               | CCW                | 21 | 51,23      | 0,431  | 20 | 1     |
|     |                   | CW                 | 21 | 48,77      |        |    |       |
|     | LEG               | CCW                | 28 | 42,20      | -2,616 | 27 | 0,058 |
|     |                   | CW                 | 28 | 57,80      |        |    |       |
| M   | ARM               | CCW                | 20 | 46,64      | -0,874 | 19 | 1     |
|     |                   | CW                 | 20 | 53,36      |        |    |       |
|     | LEG               | CCW                | 20 | 53,96      | 1,104  | 19 | 1     |
|     |                   | CW                 | 20 | 46,04      |        |    |       |

**Table S8.** Percentage of figures perceived as spinning clockwise (CW) by female and male participants according to outstretched limb and hemifield of presentation.

| OUTSTRETCHED LIMB | HEMIFIELD | SPINNING DIRECTION | SEX | N  | PERCENTAGE | t      | df | p     |
|-------------------|-----------|--------------------|-----|----|------------|--------|----|-------|
| ARM               | RIGHT     | CW                 | F   | 21 | 40,03      | -1,963 | 39 | 0,227 |
|                   |           |                    | M   | 20 | 50,54      |        |    |       |
|                   |           | CW                 | F   | 21 | 57,52      | 0,173  | 39 | 1     |
|                   |           |                    | M   | 20 | 56,19      |        |    |       |
| LEG               | LEFT      | CW                 | F   | 28 | 56,26      | 2,858  | 46 | 0,026 |
|                   |           |                    | M   | 20 | 35,73      |        |    |       |
|                   |           | CW                 | F   | 28 | 59,35      | 0,467  | 46 | 1     |
|                   |           |                    | M   | 20 | 56,35      |        |    |       |

**Table S9.** Percentage of figures perceived as spinning clockwise (CW) in the arm- and leg-outstretched versions of the experiment according to participant's sex and hemifield of presentation.

| SEX | HEMIFIELD | OUTSTRETCHED LIMB | N  | PERCENTAGE | t      | df | p     |
|-----|-----------|-------------------|----|------------|--------|----|-------|
| F   | RIGHT     | ARM               | 21 | 40,03      | -2,460 | 47 | 0,070 |
|     |           | LEG               | 28 | 56,26      |        |    |       |
|     |           | ARM               | 21 | 57,52      | -0,272 | 47 | 1     |
|     |           | LEG               | 28 | 59,35      |        |    |       |
| M   | LEFT      | ARM               | 20 | 50,54      | 2,390  | 38 | 0,088 |
|     |           | LEG               | 20 | 35,73      |        |    |       |
|     |           | ARM               | 20 | 56,19      | -0,022 | 38 | 1     |
|     |           | LEG               | 20 | 56,35      |        |    |       |
